# Supplementary material
Source: PubMed Central journal article supplement (PMC4065200)
Supplement: NIHMS581023-supplement-Supplemental_Digital_Content.pdf [file NIHMS581023-supplement-Supplemental_Digital_Content.pdf]

## **Appendix. Institutions Involved in the Consortium**

Institutions involved in the Consortium include, in alphabetical order: Baystate Medical Center, Springfield, MA; Cedars-Sinai Medical Center Burnes Allen Research Center, Los Angeles, CA; Christiana Care Health System, Newark, DE; Georgetown University Hospital , MedStar Health, Washington, DC; Indiana University Clarian Health, Indianapolis, IN; Intermountain Healthcare and the University of Utah, Salt Lake City, Utah; Maimonides Medical Center, Brooklyn, NY; MetroHealth Medical Center, Cleveland, OH.; Summa Health System, Akron City Hospital, Akron, OH; The EMMES Corporation, Rockville MD (Data Coordinating Center); University of Illinois at Chicago, Chicago, IL; University of Miami, Miami, FL; and University of Texas Health Science Center at Houston, Houston, Texas.

Laughon SK, Berghella V, Reddy UM, Sundaram R, Lu Z, and Hoffman MK. Neonatal and maternal outcomes with prolonged second stage of labor. *Obstet Gynecol* 2014;123.

The authors provided this information as a supplement to their article.
